# Supplementary material for: Effects of zinc transporters on Cryptococcus gattii virulence
Source: PubMed Central journal article supplement (PMC4423424; doi:10.1038/srep10104), 2015-05-07
Supplement: srep10104-s1.pdf [file srep10104-s1.pdf]

1 **Effects of zinc transporters on *Cryptococcus gattii* virulence**

2 Rafael de Oliveira Schneider<sup>1</sup>, Camila Diehl<sup>1</sup>, Francine Melise dos Santos<sup>1</sup>,

3 Alcía Corbellini Piffer<sup>1</sup>, Ane Acosta Wichine Garcia<sup>1</sup>, Marcos Iuri Ross

4 Kulmann<sup>1</sup>, Augusto Schrank<sup>1,2</sup>, Lívia Kmetzsch<sup>1,2</sup>, Marilene Henning

5 Vainstein<sup>1,2</sup>, Charley C. Staats<sup>1,2,\*</sup>.

6

7 **SUPPLEMENTARY MATERIAL**

8

9

10 Supplementary Figure 1

**A**

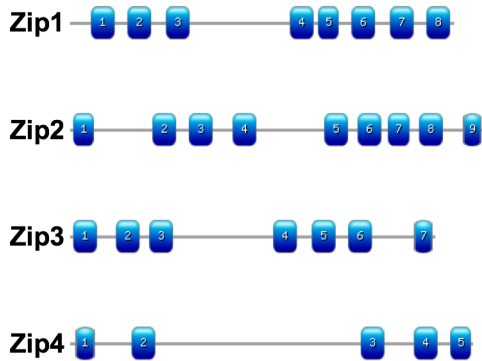

**B**

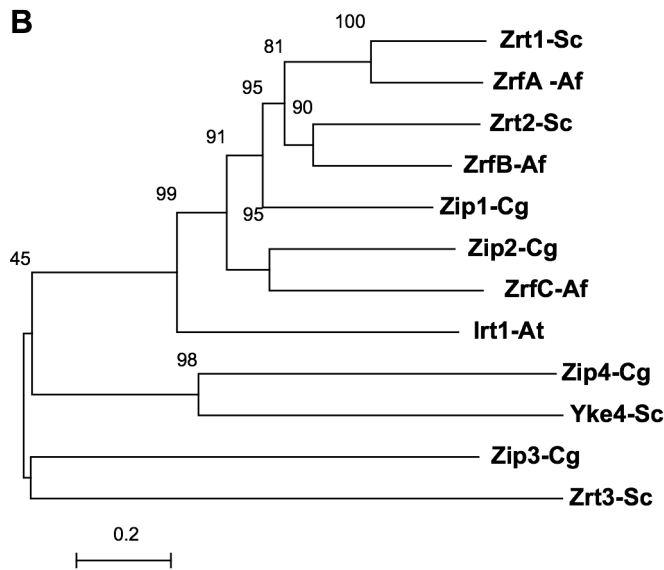

11

12

13

14

15

16

17

18

**Figure S1. Some characteristics of *C. gattii* zinc transporters of the ZIP family. A** Predicted transmembrane helices of the four Zip proteins encoded by the *C. gattii* genome were evaluated with the TMHMM tool and are illustrated as numbered blue boxes. **B** Phylogenetic analysis applying the neighbor-joining method and including Zip zinc transporters sequences from related fungi (Sc – *S. cerevisiae*; Af – *A. fumigatus*; Cg – *C. gattii*) and Irt1 from *A. thaliana*.

19 Supplementary Figure 2.

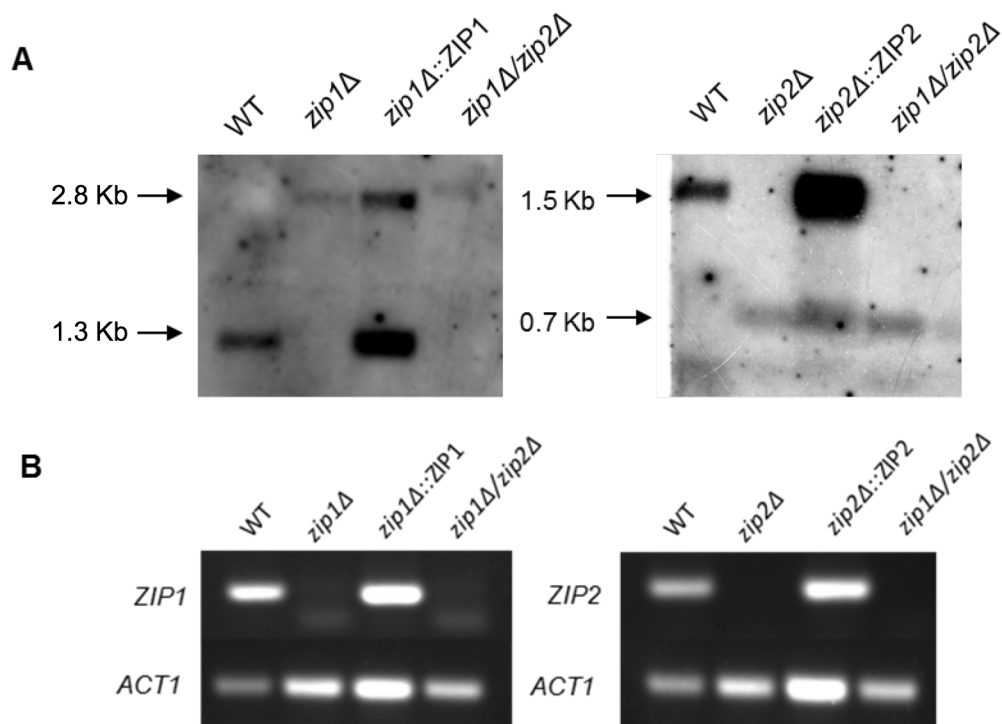

20

21 **Figure S2. Construction of knockout and complemented strains. A**

22 Confirmatory Southern blot. Genomic DNA (10 μg) from the WT, *zip1Δ*  
23 mutant, *zip1Δ::ZIP1* complemented and *zip1Δ zip2Δ* double mutant strains  
24 were digested with EcoRV. The 5' gene flanking region was used as a probe  
25 for Southern hybridization. DNA (10 μg) from the WT, *zip2Δ* mutant,  
26 *zip2Δ::ZIP2* complemented and *zip1Δ zip2Δ* double mutant strains were  
27 digested with the PstI restriction enzyme. In this experiment, the 3' gene  
28 flanking region was used as a probe for Southern hybridization. Numbers at  
29 the left indicate the hybridization signal sizes based on the position of the

30 molecular size marker. **B** Semi-quantitative RT-PCR using cDNA from the

31 WT, *zip1Δ* mutant, *zip1Δ::ZIP1* complemented and *zip1Δ zip2Δ* double mutant  
32 strains (left panel). RNA samples from the WT, *zip2Δ* mutant, *zip2Δ::ZIP2*  
33 complemented and *zip1Δ zip2Δ* double mutant strains (right panel) were used

34 as templates for a reaction employing reverse transcriptase. The upper panel  
35 shows the *ZIP* amplicons, and the lower panel shows the *ACT1* amplicons  
36 used as loading controls.

37

38 Supplementary Figure 3

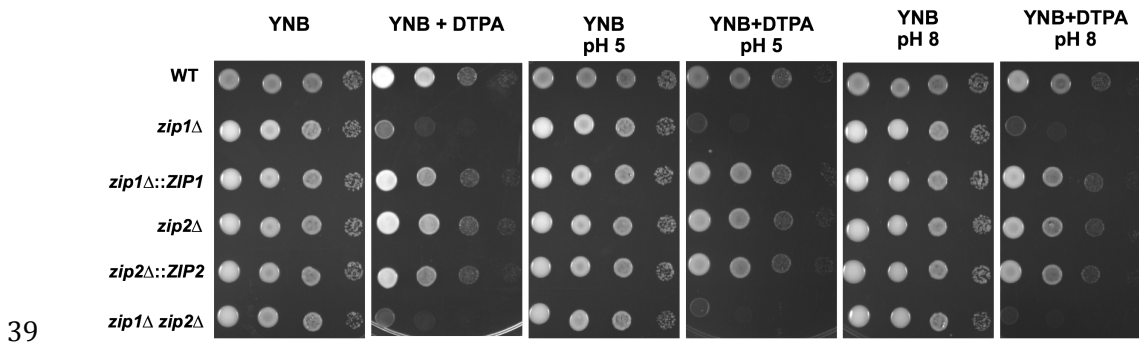

40 **Figure S3. *C. gattii* ZIP2 is not required for cryptococcal growth at**  
41 **different pHs** Growth of the WT, *zip1Δ*, *zip1Δ::ZIP1*, *zip2Δ*, *zip2Δ::ZIP2* and  
42 *zip1Δ zip2Δ* strains in YNB, YNB supplemented with 100 μM DTPA with or  
43 without 400 μM ZnCl<sub>2</sub> at alkaline pH (8) or a control pH (5) obtained using 20  
44 mM phosphate buffer.

45

46

47

48

49

50 **Supplementary Table 1: List of primers used in this work**

| <b>Primer name</b> | <b>Sequence (5'-3')</b> | <b>Purpose</b>                      |
|--------------------|-------------------------|-------------------------------------|
| <b>ZIP1-5F</b>     | AAAATAGGGATAACAGGGTAAT  | 5'-flanking amplicon of <i>ZIP1</i> |
|                    | GGAAAATGTGGATTGGATGG    | knockout construct                  |
| <b>ZIP1-5R</b>     | GGGGACAAGTTTGTACAAAAA   | 5'-flanking amplicon of <i>ZIP1</i> |
|                    | GCAGGCTATGAAATGACTGACG  | knockout construct                  |
|                    | GGTCGTT                 |                                     |
| <b>ZIP1-3F</b>     | GGGGACCACTTTGTACAAGAAA  | 3'-flanking amplicon of <i>ZIP1</i> |
|                    | GCTGGGTACATTGTAGAAAATC  | knockout construct                  |
|                    | CGTGAGAAG               |                                     |
| <b>ZIP1-3R</b>     | AAAAATTACCCTGTTATCCCTAC | 3'-flanking amplicon of <i>ZIP1</i> |
|                    | GACAGGCTCTCAACGAGAC     | knockout construct                  |
| <b>ZIP2-5F</b>     | AAAATAGGGATAACAGGGTAAT  | 5'-flanking amplicon of <i>ZIP2</i> |
|                    | AGCAAGATAGGGGCTTACCC    | knockout construct                  |
| <b>ZIP2-5R</b>     | GGGGACAAGTTTGTACAAAAA   | 5'-flanking amplicon of <i>ZIP2</i> |
|                    | GCAGGCTATCATGCATCAGCGT  | knockout construct                  |
|                    | GAGGA                   |                                     |
| <b>ZIP2-3F</b>     | GGGGACCACTTTGTACAAGAAA  | 3'-flanking amplicon of <i>ZIP2</i> |
|                    | GCTGGGTAAAAAAGGGGGAAG   | knockout construct                  |
|                    | AGTTTGG                 |                                     |

---

|                  |                                                               |                                                           |
|------------------|---------------------------------------------------------------|-----------------------------------------------------------|
| <b>ZIP2-3R</b>   | AAAATTACCCTGTTATCCCTAT<br>GAGTGGGAGCATGGAAC                   | 3'-flanking amplicon of <i>ZIP2</i><br>knockout construct |
| <b>ZIP1compF</b> | AGGGCGAATTCTGCAGATGCAA<br>GAGACTAAGTCAGAGACTAAGT<br>CAGAATCCA | <i>ZIP1</i> amplicon for<br>complementation               |
| <b>ZIP1compR</b> | CGGCCGCCAGTGTGATGGATCT<br>CTTCGACAGGCTCTCAAC                  | <i>ZIP1</i> amplicon for<br>complementation               |
| <b>ZIP2compF</b> | AGGGCGAATTCTGCAGATTTAC<br>CCGCAGAGGCTCTTT                     | <i>ZIP2</i> amplicon for<br>complementation               |
| <b>ZIP2compR</b> | CGGCCGCCAGTGTGATGGATCT<br>GGAGGACGACGATGAAGAA                 | <i>ZIP2</i> amplicon for<br>complementation               |
| <b>CGACTF</b>    | CGGTATCGTCACAAACTGG                                           | Amplification of <i>ACT1</i> for RT-<br>PCR/qRT-PCR       |
| <b>CGACTR</b>    | GGAGCCTCGGTAAGAAGAAC                                          | Amplification of <i>ACT1</i> for RT-<br>PCR/qRT-PCR       |
| <b>CNBG5361F</b> | GTGTAGCCCTTCTTTTCTCC                                          | Amplification of <i>ZIP3</i> for qRT-<br>PCR              |
| <b>CNBG5361R</b> | CAATCCTGTCCGTTGGTAC                                           | Amplification of <i>ZIP3</i> for qRT-<br>PCR              |
| <b>CNBG6066F</b> | GCTGAAGTCGCCGCTTATC                                           | Amplification of <i>ZIP1</i> for qRT-                     |

---



---

|                  |                       |                                          |
|------------------|-----------------------|------------------------------------------|
|                  |                       | PCR                                      |
| <b>CNBG6066R</b> | GGGAGGGATGGATGTGATG   | Amplification of <i>ZIP1</i> for qRT-PCR |
| <b>CNBG2209F</b> | GTCATATTGGGCAAACACTGG | Amplification of <i>ZIP2</i> for qRT-PCR |
| <b>CNBG2209R</b> | AGGGGCAACAGACTCATAG   | Amplification of <i>ZIP2</i> for qRT-PCR |

---
